# Supplementary material
Source: MDPI journal article supplement (https://www.mdpi.com/2073-4395/11/8/1575)
Supplement: s1 [file s1]

Supplementary figure and tables

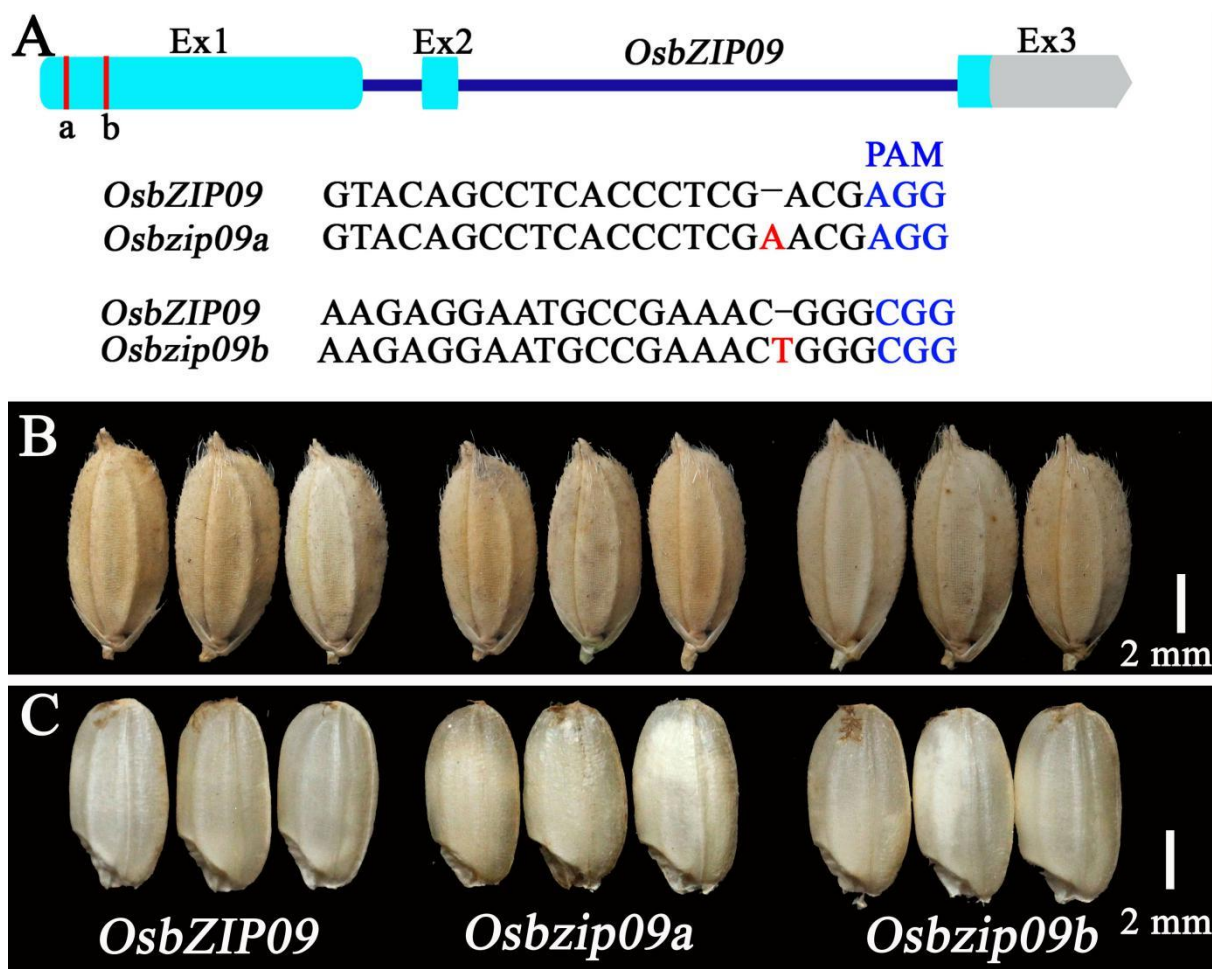

**Figure S1.** Schematic of the mutation sites in the *OsbZIP09* gene (**A**) and the phenotype of rice seeds (**B** and **C**). The protospacer adjacent motif (PAM) is highlighted in blue.

**Supplementary Table S1** Amylopectin chain distributions of amylopectin in different fractions of endosperm starch from different rice lines.

| Lines     | DPs (%)                   |                           |                           |                           |
|-----------|---------------------------|---------------------------|---------------------------|---------------------------|
|           | 6 ≤ DP ≤ 12               | 13 ≤ DP ≤ 24              | 25 ≤ DP ≤ 36              | DP ≥ 37                   |
| ZH11      | 29.13 ± 0.35 <sup>b</sup> | 42.92 ± 0.26 <sup>a</sup> | 12.04 ± 0.35 <sup>a</sup> | 16.08 ± 0.26 <sup>a</sup> |
| osbzip09a | 31.92 ± 0.52 <sup>a</sup> | 39.86 ± 0.61 <sup>b</sup> | 11.98 ± 0.48 <sup>a</sup> | 16.02 ± 0.14 <sup>a</sup> |
| osbzip09b | 32.01 ± 0.47 <sup>a</sup> | 40.05 ± 0.32 <sup>b</sup> | 12.01 ± 0.51 <sup>a</sup> | 15.97 ± 0.23 <sup>a</sup> |

<sup>a</sup> Data are presented as means ± standard deviation. For each column, values not displaying the same letter are significantly different ( $p < 0.05$ ). DP, degree of polymerisation.

**Supplementary Table S2 .** Pasting properties of starches from different rice lines.

| Lines            | PKV (cP)                   | HPV (cP)                   | BDV (cP)                  | CPV(cP)                    | SBV (cP)                  | P <sub>Time</sub> (min) | PT (°C)                 |
|------------------|----------------------------|----------------------------|---------------------------|----------------------------|---------------------------|-------------------------|-------------------------|
| ZH11             | 2582.5 ± 28.3 <sup>b</sup> | 1977.0 ± 16.9 <sup>b</sup> | 605.0 ± 11.3 <sup>b</sup> | 2835.5 ± 15.5 <sup>b</sup> | 253.5 ± 12.7 <sup>a</sup> | 6.5 ± 0.1 <sup>a</sup>  | 76.9 ± 0.1 <sup>a</sup> |
| <i>osbzip09a</i> | 3062.0 ± 15.6 <sup>a</sup> | 2262.5 ± 9.2 <sup>a</sup>  | 799.5 ± 6.7 <sup>a</sup>  | 3358.5 ± 12.7 <sup>a</sup> | 266.0 ± 18.1 <sup>a</sup> | 6.5 ± 0.1 <sup>a</sup>  | 76.7 ± 0.1 <sup>a</sup> |

|                 |                  |                   |                           |                   |                   |                        |                  |
|-----------------|------------------|-------------------|---------------------------|-------------------|-------------------|------------------------|------------------|
| <i>osbizip0</i> | 3102.5 ±         | 2196.5 ±          |                           | 3332.0 ±          | 251.5 ±           |                        | 76.6 ±           |
| <i>9b</i>       | 7.8 <sup>a</sup> | 23.3 <sup>a</sup> | 906.0 ± 15.6 <sup>a</sup> | 13.5 <sup>a</sup> | 16.3 <sup>a</sup> | 6.4 ± 0.1 <sup>a</sup> | 0.2 <sup>a</sup> |

---

All data are means ± standard deviations,  $n = 2$ . Means with the same letter in each column are not significantly different ( $p < 0.05$ ). PKV, peak viscosity; HPV, hot paste viscosity; CPV, cool paste viscosity; BDV, breakdown viscosity; SBV, setback viscosity;  $P_{\text{time}}$ , peak time; PT, pasting temperature.
